# Supplementary material
Source: PubMed Central journal article supplement (PMC4630861)
Supplement: NIHMS65766-supplement-online_supplementary.pdf [file NIHMS65766-supplement-online_supplementary.pdf]

### Supplementary I. Cluster analysis for selection of independent variables in multiple regressions

To assess the spatial relationship of AOT and PM<sub>2.5</sub>, we developed models using annual mean data from 40 cities. We used cluster analysis based on nearest neighbor Pearson correlation method to identify clusters of highly correlated variables of the satellite and meteorological data. Then we used line-parsing method at 50% full distance on a dendrogram to select one variable from each cluster for reduction of multi-collinearity in regression model.<sup>21</sup> AOT was regarded as the key independent variable so that any other variables within the same cluster was excluded in this method. We fitted multiple regression models based on the combinations of the selected independent variables from the cluster analysis. In addition, three multiple regression models using stepwise, forward and backward selection methods for all selected independent variables.<sup>21</sup>

10

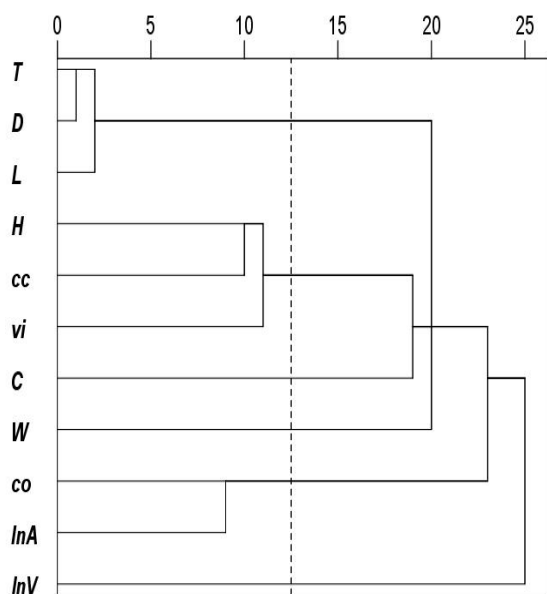

Note. T=air temperature, D=dew point, L=land surface temperature, H=relative humidity, cc=cloud cover, vi=vegetation index, C= cloud optical thickness, W=wind speed, co=carbon monoxide, A=aerosol optical thickness, V=visibility. Line-parsing method at 50% full distance on a dendrogram is a proven method that helps to select one variable from each line-parsed cluster (six clusters were parsed on the left of the dotted line) for reduction of multi-collinearity in regression modeling.

15

Supplementary II. Regression models of PM<sub>2.5</sub> and sensitivity of the model predictions.

| Model           | R     | VIF     | Regression models                                                                                                     | Temporal sensitivity<br>D <sub>1</sub> [min,max] | Spatial sensitivity<br>D <sub>2</sub> [min,max] | Overall sensitivity<br>0.5D <sub>1</sub> +0.5D <sub>2</sub> |
|-----------------|-------|---------|-----------------------------------------------------------------------------------------------------------------------|--------------------------------------------------|-------------------------------------------------|-------------------------------------------------------------|
| M1              | 0.845 | 1.2-1.7 | 7.802+0.627(lnA) <sup>***</sup> -0.997(lnV) <sup>**</sup> -0.045(C)-0.030(W)-0.018(T)-0.003(H)                        | 5.3 [0.3,14.6]                                   | 10.3 [0.6,18.2]                                 | 7.8                                                         |
| M2              | 0.847 | 1.2-1.5 | 7.759+0.615(lnA) <sup>***</sup> -0.990(lnV) <sup>**</sup> -0.045(C)*-0.030(W)-0.020(T)-0.044(cc)                      | 5.1 [0.3,14.3]                                   | 11.3 [3.3,21.5]                                 | 8.2                                                         |
| M3              | 0.845 | 1.1-1.8 | 7.700+0.618(lnA) <sup>***</sup> -1.001(lnV) <sup>**</sup> -0.044(C)-0.032(W)-0.018(T)-0.209(vi)                       | 5.1 [0.3,12.5]                                   | 10.0 [0.3,17.0]                                 | 7.6                                                         |
| M4              | 0.846 | 1.2-1.7 | 7.353+0.628(lnA) <sup>***</sup> -0.997(lnV) <sup>**</sup> -0.044(C)-0.030(W)-0.020(D)-0.002(H)                        | 10.1 [1.0,27.9]                                  | 18.4 [5.3,33.0]                                 | 14.2                                                        |
| M5              | 0.846 | 1.2-1.5 | 7.507+0.607(lnA) <sup>***</sup> -1.022(lnV) <sup>**</sup> -0.040(C)-0.028(W)-0.018(D)-0.022(cc)                       | 4.9 [0.1,13.7]                                   | 9.9 [0.0,17.5]                                  | 7.4                                                         |
| M6              | 0.846 | 1.2-1.8 | 7.476+0.616(lnA) <sup>***</sup> -1.017(lnV) <sup>**</sup> -0.041(C)-0.029(W)-0.018(D)-0.034(vi)                       | 4.8 [0.1,12.9]                                   | 9.7 [1.3,16.9]                                  | 7.3                                                         |
| M7              | 0.845 | 1.2-1.8 | 8.281+0.622(lnA) <sup>***</sup> -1.015(lnV) <sup>**</sup> -0.046(C)-0.035(W)-0.018(L)-0.007(H)                        | 5.0 [0.2,15.5]                                   | 10.2 [0.0,17.5]                                 | 7.6                                                         |
| M8              | 0.847 | 1.1-1.8 | 8.097 +0.613(lnA) <sup>***</sup> -0.987(lnV) <sup>**</sup> -0.048(C)*-0.037(W) -0.020(L)-0.068(cc)                    | 4.5 [0.3,14.9]                                   | 9.8 [1.2,17.1]                                  | 7.1                                                         |
| M9              | 0.845 | 1.1-1.8 | 7.962 +0.605(lnA) <sup>***</sup> -1.021(lnV) <sup>**</sup> -0.045(C)-0.038(W) -0.016(L)-0.436(vi)                     | 4.9 [0.2,12.8]                                   | 9.7 [0.3,16.2]                                  | 7.3                                                         |
| M10<br>stepwise | 0.865 | 1.1-1.9 | 5.042 +0.312(lnA)* -1.001(lnV) <sup>***</sup> -0.053(C) <sup>**</sup> +0.013(co) <sup>**</sup>                        | 4.2 [0.7,7.8]                                    | 12.0 [0.1,20.9]                                 | 8.1                                                         |
| M11<br>forward  | 0.865 | 1.1-1.9 | 5.042 +0.312(lnA)* -1.001(lnV) <sup>***</sup> -0.053(C) <sup>**</sup> +0.013(co) <sup>**</sup>                        | 4.2 [0.7,7.8]                                    | 12.0 [0.1,20.9]                                 | 8.1                                                         |
| M12<br>backward | 0.878 | 1.1-2.0 | 5.359 +0.350(lnA) <sup>**</sup> -0.953(lnV) <sup>***</sup> -0.047(C) <sup>**</sup> -0.030(W) +0.012(co) <sup>**</sup> | 2.7 [0.4,8.7]                                    | 13.0 [0.2,28.8]                                 | 7.9                                                         |

Note. A=aerosol optical thickness, V=visibility, C= cloud optical thickness, W=wind speed, T=air temperature, H=relative humidity, cc=cloud cover, vi=vegetation index, D=dew point, L=land surface temperature, co=carbon monoxide. VIF=Variance inflation factor, in which VIF less than 2.5 are indicative of non-collinearity. D<sub>1</sub>=Mean absolute difference between predicted and observed PM<sub>2.5</sub> based on temporal sensitivity. D<sub>2</sub>=Mean absolute difference between predicted PM<sub>2.5</sub> and 70% observed PM<sub>10</sub> concentration in PRD based on spatial sensitivity. \*p<0.05, \*\*p<0.01, \*\*\*p<0.001

10

Visual inspection of the major independent variables: ln-transformed data of PM<sub>2.5</sub> versus AOT and visibility in 40 cities.

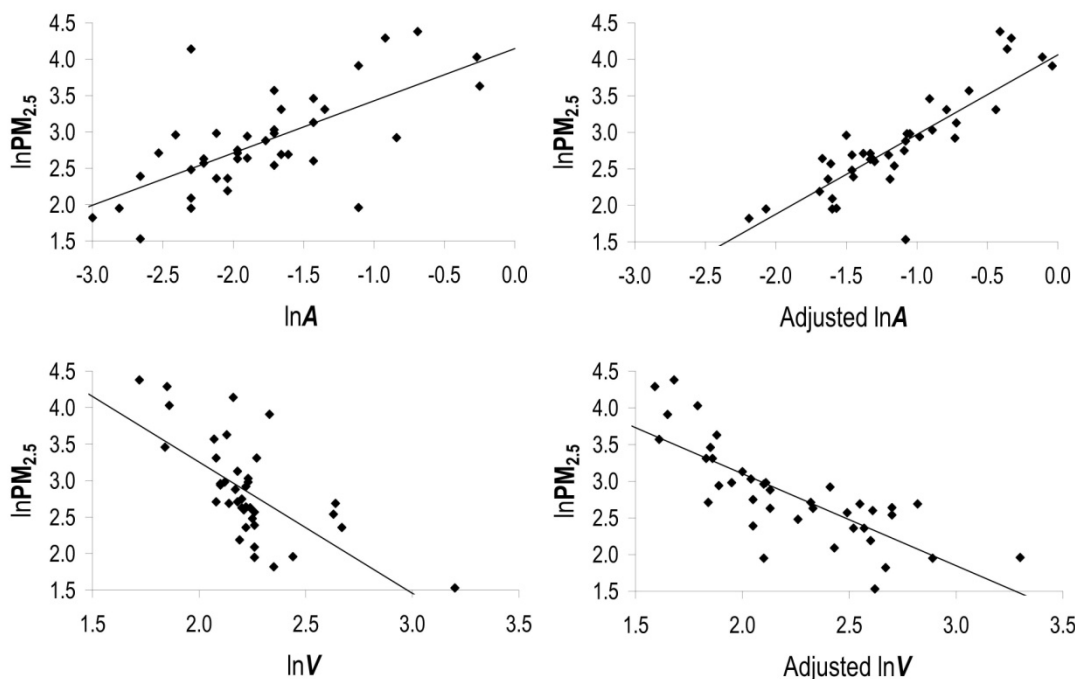

Note. A=aerosol optical thickness, V=visibility. lnA and lnV on the left were unadjusted whereas on the right were adjusted for all other covariates in M8.

15



**Supplementary III. Excess risks of all-cause mortality for PM<sub>2.5</sub> in all age groups due to air pollution in the selected literatures**

| Country             | City             | Period    | Lag | ER                      | SE          | Author, year                      | Ref |
|---------------------|------------------|-----------|-----|-------------------------|-------------|-----------------------------------|-----|
| <b>America</b>      |                  |           |     |                         |             |                                   |     |
| Canada              | 8 cities         | 1986-1996 | 1   | 1.20                    | 0.41        | Burnett <i>et al.</i> , 2000      | 63  |
| Mexico              | Mexico City      | 1993-1995 | 0   | 1.34                    | 0.60        | Borja-Aburto <i>et al.</i> , 1998 | 64  |
| United States       | 112 cities       | 1999-2005 | 0-1 | 0.98                    | 0.12        | Zanobetti and Schwartz, 2009      | 65  |
| United States       | Coachella Valley | 1989-1998 | 1   | -1.00                   | 2.10        | Ostro <i>et al.</i> , 2000        | 66  |
| United States       | Portage          | 1979-1987 | 0-1 | 1.20 <sup>†</sup>       | 0.77        | Schwartz <i>et al.</i> , 1996     | 67  |
| United States       | Topeka           | 1979-1988 | 0-1 | 0.80 <sup>†</sup>       | 1.43        | Schwartz <i>et al.</i> , 1996     | 67  |
| <i>Pooled ER</i>    |                  |           |     | <i>1.01<sup>F</sup></i> | <i>0.11</i> |                                   |     |
| <b>Europe</b>       |                  |           |     |                         |             |                                   |     |
| Czech Republic      | 5 cities         | 1992-1994 | 1   | 0.59 <sup>†</sup>       | 0.40        | Peters <i>et al.</i> , 2000       | 68  |
| Czech Republic      | Prague           | 2006-2006 | 1   | 0.40 <sup>†</sup>       | 0.61        | Branis <i>et al.</i> , 2010       | 69  |
| Germany             | Erfurt           | 1995-2001 | 0   | 0.49 <sup>†</sup>       | 0.66        | Peters <i>et al.</i> , 2009       | 70  |
| Spain               | Barcelona        | 2003-2007 | 1   | 1.40                    | 0.41        | Ostro <i>et al.</i> , 2011        | 71  |
| Spain               | Madrid           | 2003-2005 | 1   | 3.00                    | 0.77        | Tobias <i>et al.</i> , 2011       | 72  |
| Sweden              | Stockholm        | 2000-2008 | 0-1 | 1.46                    | 0.71        | Meister <i>et al.</i> , 2012      | 73  |
| United Kingdom      | London           | 2000-2005 | 1   | 0.24 <sup>†</sup>       | 0.32        | Atkinson <i>et al.</i> , 2010     | 74  |
| United Kingdom      | West Midlands    | 1994-1996 | 0-1 | 0.30 <sup>†</sup>       | 0.61        | Anderson <i>et al.</i> , 2001     | 75  |
| <i>Pooled ER</i>    |                  |           |     | <i>0.88</i>             | <i>0.28</i> |                                   |     |
| <b>Asia-Pacific</b> |                  |           |     |                         |             |                                   |     |
| Australia           | 3 cities         | 1996-1999 | 0-1 | 0.90 <sup>†</sup>       | 0.82        | Simpson <i>et al.</i> , 2005      | 76  |
| China               | Beijing          | 2007-2008 | 0   | 0.53                    | 0.08        | Chen <i>et al.</i> , 2011         | 77  |
| China               | Chongqing        | 1995-1995 | 0   | 0.00 <sup>†</sup>       | 0.36        | Venners <i>et al.</i> , 2003      | 78  |
| China               | Guangzhou        | 2007-2008 | 1   | 1.26                    | 0.10        | Yang <i>et al.</i> , 2011         | 61  |
| China               | Shanghai         | 2004-2008 | 0   | 0.47                    | 0.13        | Chen <i>et al.</i> , 2011         | 79  |
| China               | Shenyang         | 2006-2008 | 0-1 | 0.49                    | 0.15        | Ma <i>et al.</i> , 2011           | 80  |
| China               | Xian             | 2004-2008 | 1   | 0.16                    | 0.04        | Cao <i>et al.</i> , 2012          | 81  |
| Japan               | Tokyo            | 2003-2008 | 0   | 0.30 <sup>†</sup>       | 0.20        | Yorifuji <i>et al.</i> , 2011     | 16  |
| Korea               | Seoul            | 2008-2009 | 1   | 0.50 <sup>†</sup>       | 0.37        | Son <i>et al.</i> , 2012          | 82  |
| <i>Pooled ER</i>    |                  |           |     | <i>0.50</i>             | <i>0.16</i> |                                   |     |
| <b>Overall ER</b>   |                  |           |     | <b>0.69</b>             | <b>0.12</b> |                                   |     |

"ER" represents excess risk (%) per 10 µgm<sup>-3</sup> increase in pollutant concentration. "SE" represents standard error. All the pooled ER are random effects otherwise specified.

<sup>F</sup> represented fixed effects. † indicated statistically not significant at alpha=0.05.

**Supplementary IV. Excess risks of cardiovascular and respiratory mortality for PM<sub>2.5</sub> in all age groups due to air pollution in different reviewed studies**

| Country               | City                  | Period    | Lag | ER          | SE          | Author, year                 | Ref |
|-----------------------|-----------------------|-----------|-----|-------------|-------------|------------------------------|-----|
| <b>Cardiovascular</b> |                       |           |     |             |             |                              |     |
| Australia             | Melbourne             | 1991-1996 | 0   | 0.30 †      | 1.22        | Simpson et al., 2000         | 83  |
| Australia             | Sydney                | 1989-1993 | 0   | 1.60        | 0.82        | Morgan et al., 1998          | 84  |
| Canada                | Montreal              | 1984-1993 | 1   | 1.34 †      | 0.92        | Goldberg et al., 2001        | 85  |
| China                 | Beijing               | 2007-2008 | 0   | 0.58        | 0.12        | Chen et al., 2011            | 77  |
| China                 | Chongqing             | 1995-1995 | 0   | 0.00        | 0.68        | Venners et al., 2003         | 78  |
| China                 | Guangzhou             | 2007-2008 | 0   | 1.01        | 0.26        | Yang et al., 2011            | 61  |
| China                 | Shanghai              | 2004-2008 | 0   | 0.41        | 0.21        | Chen et al., 2011            | 79  |
| China                 | Shenyang              | 2006-2008 | 0-1 | 0.53        | 0.22        | Ma et al., 2011              | 80  |
| China                 | Xian                  | 2004-2008 | 1   | 0.27        | 0.07        | Cao et al., 2012             | 81  |
| Czech Republic        | Prague                | 2006-2006 | 1   | 0.90 †      | 0.92        | Branis et al., 2010          | 69  |
| Japan                 | Tokyo                 | 2003-2008 | 0   | 0.60 †      | 0.36        | Yorifuji et al., 2011        | 16  |
| Korea                 | Seoul                 | 2008-2009 | 0   | 0.92 †      | 0.79        | Son et al., 2012             | 82  |
| Spain                 | Barcelona             | 2003-2007 | 1   | 2.87        | 0.75        | Ostro et al., 2011           | 71  |
| United Kingdom        | London                | 2000-2005 | 0   | 0.48 †      | 0.52        | Atkinson et al., 2010        | 74  |
| United Kingdom        | West Midlands         | 1994-1996 | 0-1 | 0.51 †      | 0.86        | Anderson et al., 2001        | 75  |
| United States         | 9 California counties | 2000-2003 | 0   | 0.46        | 0.21        | Ostro et al., 2007           | 86  |
| United States         | Coachella Valley      | 1989-1998 | 1   | -0.81       | 3.15        | Ostro et al., 2000           | 66  |
| United States         | Phoenix               | 1995-1997 | 1   | 3.80        | 1.56        | Wilson et al., 2007          | 87  |
| United States         | Washington            | 1995-1999 | 1   | 1.00 †      | 2.04        | Slaughter et al., 2005       | 88  |
| United States         | Wayne                 | 1992-1994 | 1   | 1.28 †      | 1.12        | Lippmann et al., 2000        | 89  |
| <b>Pooled ER</b>      |                       |           |     | <b>0.60</b> | <b>0.10</b> |                              |     |
| <b>Respiratory</b>    |                       |           |     |             |             |                              |     |
| Australia             | Melbourne             | 1991-1996 | 0   | -0.70 †     | 2.96        | Simpson et al., 2000         | 83  |
| Australia             | Sydney                | 1989-1993 | 1   | 2.30 †      | 1.84        | Morgan et al., 1998          | 84  |
| Canada                | Montreal              | 1984-1993 | 1   | 5.00        | 2.14        | Goldberg et al., 2001        | 85  |
| China                 | Beijing               | 2007-2008 | 0   | 0.66        | 0.23        | Chen et al., 2011            | 77  |
| China                 | Guangzhou             | 2007-2008 | 1   | 0.98        | 0.23        | Yang et al., 2011            | 61  |
| China                 | Shanghai              | 2004-2008 | 1   | 0.71 †      | 0.39        | Chen et al., 2011            | 79  |
| China                 | Shenyang              | 2006-2008 | 0-1 | 0.97        | 0.49        | Ma et al., 2011              | 80  |
| China                 | Xian                  | 2004-2008 | 1   | 0.40        | 0.09        | Cao et al., 2012             | 81  |
| Czech Republic        | Prague                | 2006-2006 | 0   | -2.30 †     | 2.14        | Branis et al., 2010          | 69  |
| Japan                 | Tokyo                 | 2003-2008 | 0   | 1.00 †      | 0.51        | Yorifuji et al., 2011        | 16  |
| Korea                 | Seoul                 | 2008-2009 | 1   | 0.78 †      | 1.36        | Son et al., 2012             | 82  |
| United Kingdom        | London                | 2000-2005 | 1   | 0.46 †      | 0.79        | Atkinson et al., 2010        | 74  |
| United Kingdom        | West Midlands         | 1994-1996 | 0-1 | -0.06 †     | 1.53        | Anderson et al., 2001        | 75  |
| United States         | 112 cities            | 1999-2005 | 0-1 | 1.68        | 0.33        | Zanobetti and Schwartz, 2009 | 65  |
| United States         | Coachella Valley      | 1989-1998 | 1   | -5.31 †     | 8.06        | Ostro et al., 2000           | 66  |
| United States         | Wayne                 | 1992-1994 | 0   | 0.92 †      | 2.52        | Lippmann et al., 2000        | 89  |
| <b>Pooled ER</b>      |                       |           |     | <b>0.83</b> | <b>0.17</b> |                              |     |

<sup>s</sup> "ER" represents excess risk (%) per 10 µg<sup>m</sup>-<sup>3</sup> increase in pollutant concentration. "SE" represents standard error. All the pooled ER are random effects.

† indicated statistically not significant at alpha=0.05.

Supplementary V. Literature review - detection of heterogeneity and publication bias.

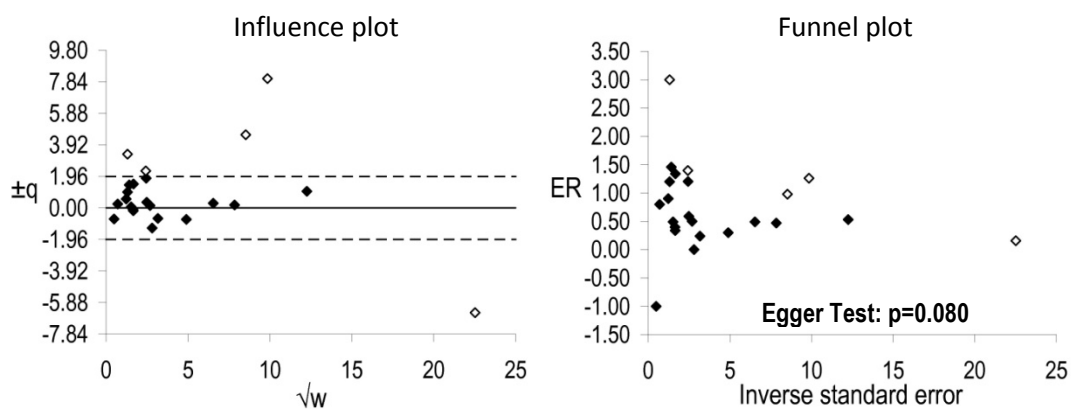

*Note.*  $\pm q$  is the square root of heterogeneity measure of  $Q^2$  statistics.<sup>25</sup>  $\sqrt{w}$  is the square root of weights that based on estimate precisions. Solid  $\diamond$ s and hollow dots represent studies with  $\pm q < -1.96$  and  $\geq 1.96$ , respectively.

**Supplementary VI. Summary of excess risks of different causes of mortality in all age groups due to PM<sub>2.5</sub>**

| Health outcomes                        | ER                       | SE   | Ref                                       | Number of studies |
|----------------------------------------|--------------------------|------|-------------------------------------------|-------------------|
| All causes                             | <b>0.69</b>              | 0.12 | 16,61,63-78,80-82                         | 21                |
| Cardiovascular diseases                | <b>0.60</b>              | 0.10 | 16,61,66,69,71, 74-75,77-78,80-89         | 19                |
| Cerebrovascular diseases               | <b>1.74</b> <sup>F</sup> | 0.40 | 16,65                                     | 2                 |
| Ischemia heart diseases                | <b>1.18</b>              | 0.57 | 16,67,90-91                               | 4                 |
| Myocardial infarction                  | <b>1.19</b>              | 0.53 | 65,92                                     | 2                 |
| Arrhythmia                             | 2.70 <sup>†</sup>        | 1.53 | 16                                        | 1                 |
| Heart diseases                         | <b>0.90</b> <sup>F</sup> | 0.19 | 65,92                                     | 2                 |
| Heart failure                          | 2.51 <sup>†</sup>        | 1.66 | 92                                        | 1                 |
| Respiratory diseases                   | <b>0.83</b>              | 0.17 | 16,61,65-67,69,74-75,77-78,80-82,83-85,89 | 17                |
| Chronic obstructive pulmonary diseases | <b>1.53</b> <sup>†</sup> | 0.89 | 16,67,78                                  | 3                 |
| Influenza and pneumonia                | 0.90 <sup>†</sup>        | 0.56 | 16                                        | 1                 |
| Pneumonia                              | 4.00                     | 1.12 | 67                                        | 1                 |
| Cardiopulmonary diseases               | 0.06 <sup>†</sup>        | 0.71 | 93                                        | 1                 |
| Non-cardiopulmonary                    | 0.00 <sup>†</sup>        | 0.26 | 16                                        | 1                 |

"ER" with **Bold** represents pooled excess risk (%) per 10 µg<sup>m</sup>-<sup>3</sup> increase in pollutant concentration. "ER" not **Bold** was the ER of single study. "SE" represents standard error in 10<sup>-4</sup>. All the pooled ER are random effects otherwise specified.

<sup>F</sup> represented fixed effects.

<sup>†</sup> indicated statistically not significant at alpha=0.05.
